# Supplementary material for: Preparation of a gold@europium-based coordination polymer nanocomposite with excellent photothermal properties and its potential for four-mode imaging
Source: Royal Society of Chemistry journal article supplement (doi:10.1039/d2nj01021f), 2022-01-01
Supplement: d2nj01021f1.pdf [file d2nj01021f1.pdf]

## Supplementary Information

### **Preparation of gold@europium-based coordination polymer nanocomposite structures with excellent photothermal properties and its four-mode imaging technique**

Faming Xia,<sup>a</sup> Xuejiao Gao,<sup>a</sup> Xiaomei Shen,<sup>a</sup> Hualan Xu<sup>b\*</sup>, Shengliang Zhong\*

<sup>a</sup> *Key Lab of Fluorine and Silicon for Energy Materials and Chemistry of Ministry of Education, College of Chemistry and Chemical Engineering, Jiangxi Normal University, Nanchang, 330022, China*

<sup>b</sup> *Analytical and Testing Center, Jiangxi Normal University, Nanchang 330022, China*

\*corresponding author.

\*E-mail: slzhong@jxnu.edu.cn

## Calculation of the photothermal conversion efficiency

Following literature report<sup>1</sup>, the total energy balance for the system is

$$\sum_i m_i C_{p,i} \frac{dT}{dt} = Q_{NPs} + Q_S - Q_{loss} \quad (1)$$

where  $m$  and  $C_p$  are the mass and heat capacity, respectively. The suffix “ $i$ ” of  $m$  and  $C_p$  refers to

solvent(water) or dispersed matter (nanopods).  $T$  is the solution temperature.  $Q_{NRs}$  is the

photothermal energy absorbed by GNRs@EuCP NPs per second:

$$Q_{NRs} = I(1 - 10^{-A_{980}})\eta \quad (2)$$

where  $I$  is the laser power,  $A_{\lambda}$  is the absorbance of GNRs@EuCP at the wavelength of 980 nm in

aqueous solution, and  $\eta$  is the photothermal conversion efficiency of GNRs@EuCP NRs which

means the ratio of absorbed light energy converting to thermal energy.

$Q_{loss}$  is thermal energy lost to the surroundings:

$$Q_{loss} = hA\Delta T \quad (3)$$

Where  $h$  is the heat transfer coefficient,  $A$  is the surface area of the container, and  $\Delta T$  is the

changed temperature, which is referred to  $T - T_{surr}$  ( $T$  and  $T_{surr}$  are the solution temperature and

ambient temperature of the surrounding, respectively).

$Q_s$  is the heat associated with the light absorbed by solvent per second. In the situation of heating

pure water, the heat input is equal to the heat output at the maximum steady-state temperature, so

the equation can be:

$$Q_S = Q_{loss} = hA\Delta T_{max,H_2O} \quad (4)$$

Where  $\Delta T_{max,H_2O}$  is the temperature change of water at the maximum steady-state temperature.

As it to the experiment of GNRs@EuCP NRs dispersion, the heat inputs are the heat generated by

Nanoparticles (Q<sub>NPs</sub>) and the heat generated by water (Q<sub>s</sub>), which is equal to the heat out put at

the maximum steady-state temperature, so the equation can be:

$$Q_{NPs} + Q_S = Q_{loss} = hA\Delta T_{max,mix} \quad (5)$$

Where  $\Delta T_{max,mix}$  is the temperature change of the GNRs@EuCP NRs dispersion at the maximum

steady state temperature. According to the equation (2), (4) and (5), the photothermal conversion

efficiency ( $\eta$ ) can be expressed as following:

$$\eta = \frac{hA\Delta T_{max,mix} - hA\Delta T_{max,H_2O}}{I(1 - 10^{-A_{980}})} = \frac{hA(\Delta T_{max,mix} - \Delta T_{max,H_2O})}{I(1 - 10^{-A_{980}})} \quad (6)$$

In this equation, only  $hA$  is unknown. In order to get the  $hA$ , we introduce  $\theta$ , which is defined as

the ratio of  $\Delta T$  to  $\Delta T_{max}$ :

$$\theta = \frac{\Delta T}{\Delta T_{max}} \quad (7)$$

Substituting equation (7) into equation (1):

$$\frac{d\theta}{dt} = \frac{hA}{\sum_i m_i C_{p,i}} \left[ \frac{Q_{NPs} + Q_S}{hA\Delta T_{max}} - \theta \right] \quad (8)$$

When the laser was shut off, the  $Q_{NPs} + Q_S = 0$ , equation (8) could be expressed to:

$$dt = - \frac{\sum_i m_i C_{p,i} d\theta}{hA \theta} \quad (9)$$

Equation (9) changes the expression:

$$t = - \frac{\sum_i m_i C_{p,i}}{hA} \ln \theta \quad (10)$$

Where  $\frac{\sum_i m_i C_{p,i}}{hA}$  can be calculated by linear relationship of time versus  $-\ln(\theta)$ . As the  $m_{H_2O}$  was 2 g.  $C_{p,H_2O}$  was  $4.2 \text{ J}^{-1}\text{g}^{-1}$ . So we can get  $hA$  equals 0.0295.

According to equation (6),  $\Delta T_{\max, \text{mix}}$  was  $50^\circ\text{C}$ .  $\Delta T_{\max, H_2O}$  is  $12^\circ\text{C}$ .  $I$  was 1.57 W where the area of light spot was  $3.14 \text{ cm}^2$ .  $A_{980}$  was 1.365 Thus, the photothermal conversion efficiency ( $\eta$ ) of GNRs@EuCP NRs could be calculated to be 74.6%.

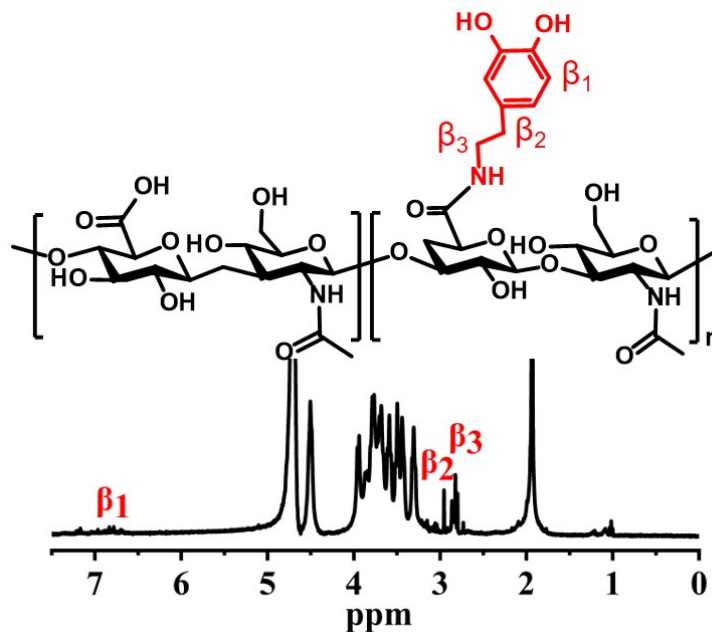

Fig. S1 1HNMR spectra of HA1.

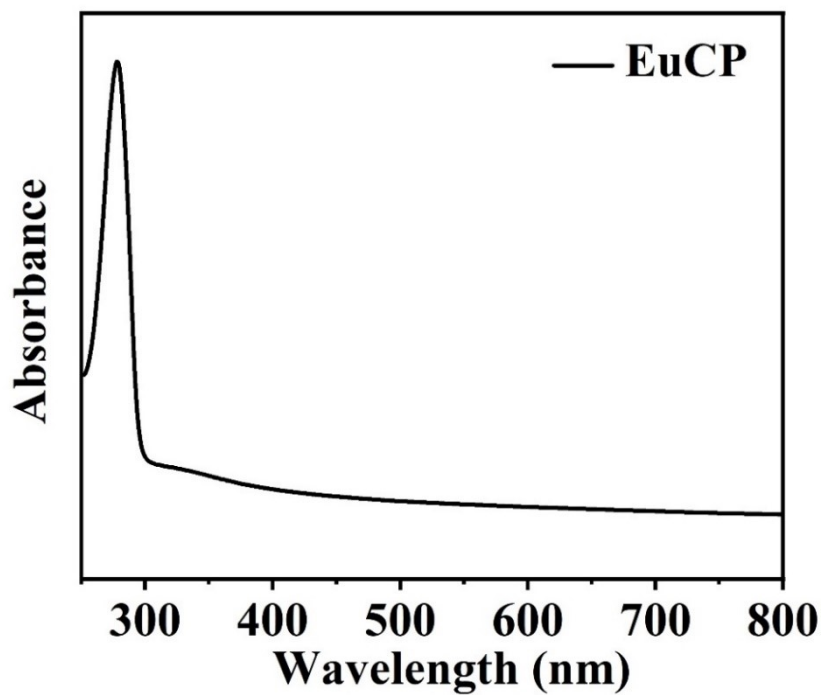

Fig. S2 UV-vis-NIR spectra of EuCP.

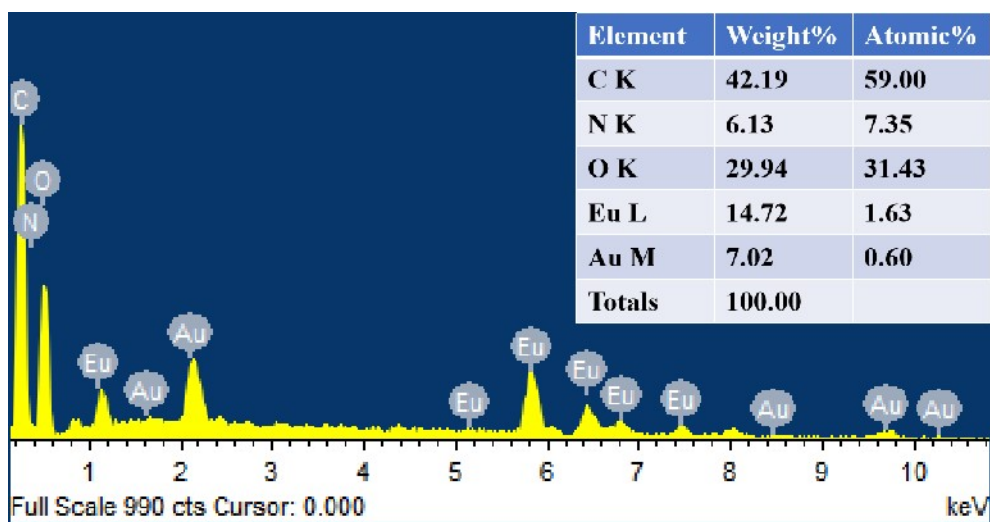

Fig. S3 EDS spectra of GNRs@EuCP.

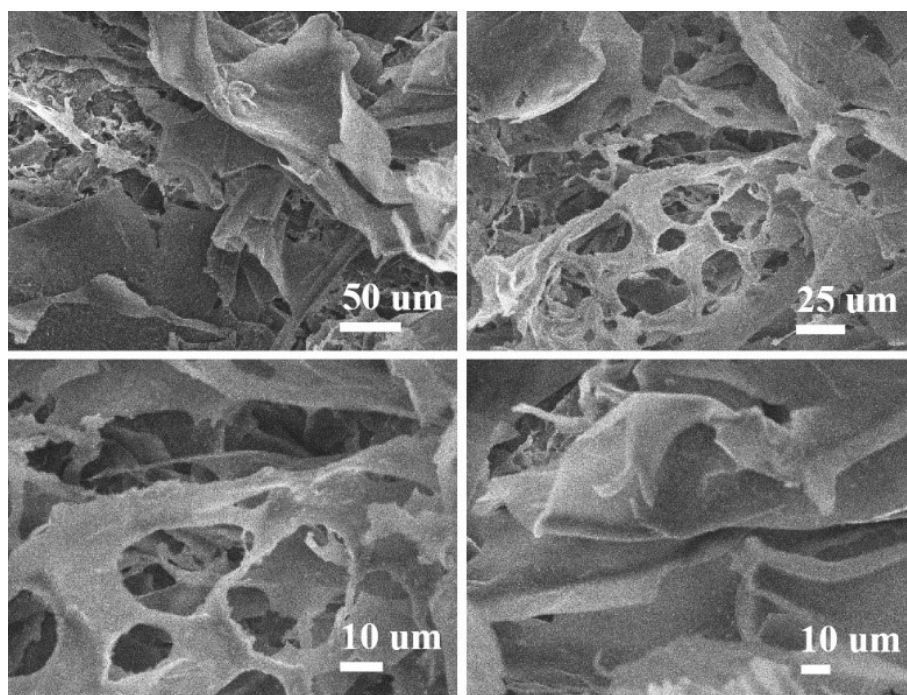

**Fig. S4** SEM images of EuCP.

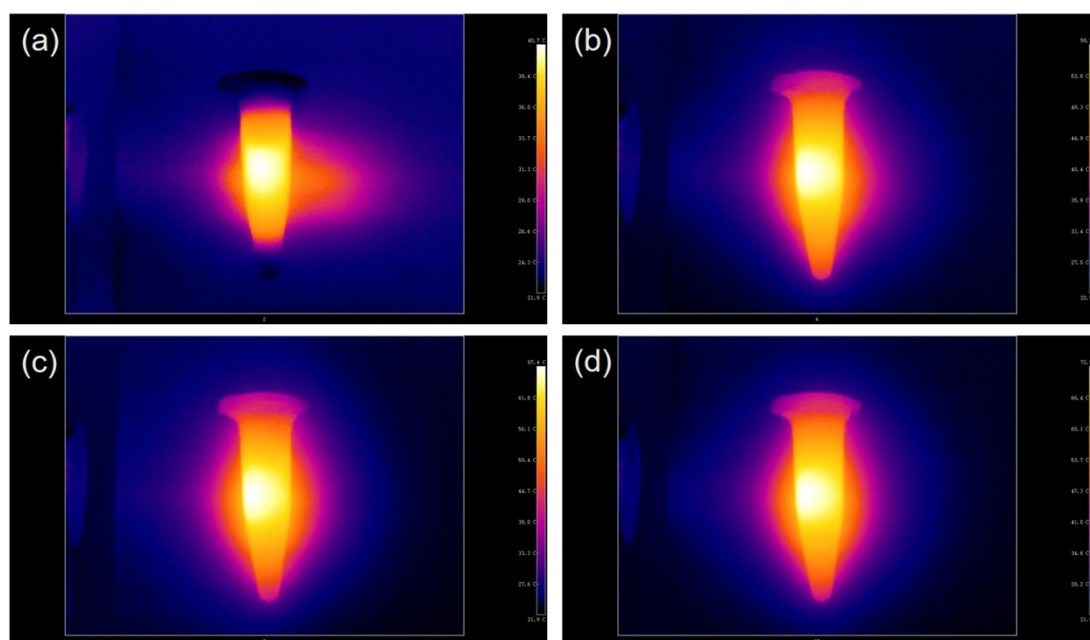

**Fig. S5** (a, b, c, d). Corresponding infrared thermal images of GNRs@EuCP at 2, 6, 8 and 10 min intervals.

## References

1. W. Ren, Y. Yan, L. Zeng, Z. Shi, A. Gong, P. Schaaf, D. Wang, J. Zhao, B. Zou, H. Yu, G. Chen, E. M. Brown and A. Wu, *Adv. Healthc. Mater.*, 2015, **4**, 1526-1536.
